## Highly Prevalent Genetic Alterations in Receptor Tyrosine Kinases and Phosphatidylinositol 3-Kinase/Akt and Mitogen-Activated Protein Kinase Pathways in Anaplastic and Follicular Thyroid Cancers

Zhi Liu, Peng Hou, Meiju Ji, Haixia Guan, Kimberly Studeman, Kirk Jensen, Vasily Vasko, Adel K. El-Naggar, and Mingzhao Xing

Division of Endocrinology and Metabolism (Z.L., P.H., M.J., H.G., M.X.), Department of Pathology (K.S.), the Johns Hopkins University School of Medicine, Baltimore, Maryland 21287; Department of Pediatrics (K.J., V.V.), Uniformed Services University of Health Sciences, Bethesda, Maryland 20814; and Department of Pathology (A.K.E.-N.), M. D. Anderson Cancer Center, Houston, Texas 77030

**Context:** Genetic alterations in receptor tyrosine kinases (RTKs) and phosphatidylinositol 3-kinase (PI3K)/Akt and MAPK pathways have not been fully defined in anaplastic and follicular thyroid cancers [anaplastic thyroid cancer (ATC), follicular thyroid cancer (FTC)].

**Objective:** The objective of the study was to explore a wide-range genetic basis for the involvement of these pathways in ATC.

**Design:** We examined mutations and copy number gains of a large panel of genes in these pathways and corresponding phosphorylation of ERK (p-ERK) and Akt.

**Results:** We found frequent copy gains of RTK genes, including *EGFR*, *PDGFR $\alpha$*  and *- $\beta$* , *VEGFR1* and *2*, *KIT*, and *MET* and in *PIK3Ca*, *PIK3Cb*, and *PDK1* genes in the PI3K/Akt pathway. Mutations of *Ras*, *PIK3Ca*, *PTEN*, and *BRAF* genes and *RET/PTC* rearrangements were common, whereas mutations in *PDK1*, *Akt1*, *Akt2*, and RTK genes were uncommon in ATC. Overall, 46 of 48 ATC (95.8%) harbored at least one genetic alteration, and coexistence of two or more was seen in 37 of 48 ATC (77.1%). These genetic alterations were somewhat less common in FTC. Genetic alterations that could activate both the PI3K/Akt and MAPK pathways were found in 39 of 48 ATC (81.3%). RTK gene copy gains were preferentially associated with p-Akt, suggesting their dominant role in activating the PI3K/Akt pathway. The phosphorylation of Akt was far more common than p-ERK in FTC, and both were relatively common and often coexisted in ATC.

**Conclusions:** Genetic alterations in the RTKs and PI3K/Akt and MAPK pathways are extremely prevalent in ATC and FTC, providing a strong genetic basis for an extensive role of these signaling pathways and the development of therapies targeting these pathways for ATC and FTC, particularly the former. (*J Clin Endocrinol Metab* 93: 3106–3116, 2008)

Follicular cell-derived thyroid cancer is the most common endocrine malignancy and can be classified into well-differentiated thyroid cancer and anaplastic thyroid cancer (ATC) (1). Well-differentiated thyroid cancer includes papillary thyroid cancer (PTC) and follicular thyroid cancer (FTC) and may some

times progress to ATC. ATC is the most common cause of death from thyroid cancer, which usually occurs soon after the diagnosis (2). Several recent studies have investigated the role of genetic alterations in the phosphatidylinositol 3-kinase (PI3K)/Akt and MAPK pathways in thyroid cancers, including ATC

0021-972X/08/\$15.00/0

Printed in U.S.A.

Copyright © 2008 by The Endocrine Society

doi: 10.1210/jc.2008-0273 Received February 5, 2008. Accepted May 7, 2008.

First Published Online May 20, 2008

Abbreviations: ATC, Anaplastic thyroid cancer; EGFR, epidermal growth factor receptor; FTC, follicular thyroid cancer; KIT, another name for stem cell factor receptor; MET, another name for hepatocyte growth factor receptor; p-Akt, phosphorylation of Akt; PDGFR, platelet-derived growth factor receptor; PDK1, phosphoinositide-dependent kinase 1; p-ERK, phosphorylation of ERK; PI3K, phosphatidylinositol 3-kinase; PIP<sub>3</sub>, phosphatidylinositol-3, 4, 5-trisphosphate; PTC, papillary thyroid cancer; PTEN, phosphatase and tensin homologue deleted from chromosome 10; RTK, receptor tyrosine kinase; VEGFR, vascular endothelial growth factor receptor.

(3–7). Because of the relatively small size of the series or the small number of genes investigated in these studies, the full extent of the genetic alterations and their relationship with these pathways in ATC remain unknown.

The PI3K/Akt pathway plays a fundamental role in the regulation of cell growth, division, survival, and, when disarranged, tumorigenesis (8, 9). Signaling of this pathway involves PI3K-catalyzed generation of phosphatidylinositol-3, 4, 5-trisphosphate (PIP<sub>3</sub>). PIP<sub>3</sub> recruits phosphoinositide-dependent kinase 1 (PDK1), which activates the Ser/Thr protein kinase Akt through phosphorylation at the cell membrane. Activated Akt in turn phosphorylates and regulates downstream effector proteins and promotes cell proliferation and survival. Phosphatase and tensin homolog deleted from chromosome 10 (PTEN) negatively regulates this pathway by acting as a lipid phosphatase that degrades PIP<sub>3</sub> and terminates the signaling (10). PI3K is composed of a heterodimer of a p85 regulatory subunit and one of several p110 catalytic subunits, such as PIK3Ca and PIK3Cb. Ras is also an important regulator of the PI3K/Akt pathway through its interactions with the Ras-binding domains of PI3K subunits. The Ras → Raf → MAPK kinase (MEK) → ERK/MAPK pathway similarly plays a fundamental role in the regulation of cell proliferation and survival and its aberrant activation is associated with tumorigenesis (11, 12). Genetic alterations in the *Ras*, *BRAF*, *PIK3Ca*, and *PTEN* genes are common in the PI3K/Akt and MAPK pathways in human cancers (11, 12), including thyroid cancer (3–7, 13). Signalings of the PI3K/Akt and MAPK pathways can both start at various receptor tyrosine kinases (RTKs). Consequently, RTKs play an important role in a variety of cellular processes and tumorigenesis (14). Many RTKs are involved in tumor progression and metastasis through mutations or genetic amplifications. These include epidermal growth factor receptor (EGFR) (15–17), platelet-derived growth factor receptor (PDGFR) (17–20), vascular endothelial growth factor receptor (VEGFR) (17, 20, 21), stem cell factor receptor (SCFR or KIT) (17, 18, 22), and hepatocyte growth factor receptor (HGFR or MET) (23, 24). Many of the genetically activated RTKs are potential therapeutic targets for human cancers (14).

Based on the increasing accumulation of genetic alterations in the PI3K/Akt and MAPK pathways from low-grade thyroid tumor to ATC, we have recently proposed a model in which dual involvement of both pathways may play a key role in the development of ATC (5). This was based, however, on the analysis of limited number of genes in these signaling pathways. Consequently, the extent of the involvement of the PI3K/Akt and MAPK pathways remains uncertain in ATC. To further explore the genetic bases for potential development of novel therapy for ATC targeting RTKs and their coupled PI3K/Akt and MAPK pathways, in the present study we extensively investigated a large panel of genes in these signaling pathways for genetic alterations in ATC and, for comparison, also in FTC.

## Materials and Methods

### Human thyroid samples and DNA isolation

Paraffin-embedded thyroid tumor samples, including 51 ATC and 64 FTC, were originally obtained and prepared for genomic DNA isolation

with institutional review board approvals as described previously (5). Briefly, after xylene treatment for 8–10 h at room temperature to remove paraffin, tissues were digested with 1% sodium dodecyl sulfate-proteinase K at 48 C for 36–48 h and 3–5 μl of 20% sodium dodecyl sulfate-proteinase K was added to facilitate the digestion. DNA was subsequently isolated following standard phenol-chloroform extraction and ethanol precipitation protocols.

### Detection of mutations in RTKs

Genomic DNA sequencing was performed for mutation analysis on the genes for specific RTKs or their subtypes that were found to harbor mutations in other cancers. The PCR primers used are summarized in Table 1. For *EGFR* gene, we selected exons 18–21 (tyrosine kinase domain) for mutation analysis because most functional mutations are clustered within this domain (25). Genomic DNA was amplified by PCR as follows: after 5 min denaturing at 95 C, the reaction mixture was run for 35 cycles at 94 C, 62 C, and 72 C, each for 30 sec, followed by an elongation at 72 C for 10 min (for all the four exons). For *PDGFRα* gene, most mutations have been identified in exon 12 (juxtamembrane domain) and exon 18 (tyrosine kinase domain) in human cancers (19). We therefore selected these two exons for mutation analysis. The two exons were amplified by PCR as follows: after a 5-min denature at 95 C, the reaction mixture was run for 35 cycles at 94 C, 60 C, and 72 C, each for 30 sec, followed by an elongation at 72 C for 10 min. For *VEGFR2* gene, mutations have been reported to be mostly in exon 26 (kinase domain) (21), which we amplified for mutation analysis in the present study using the same PCR condition as for *PDGFRα* gene. For *KIT* gene, we selected exons 9 and 11 for analysis as they most commonly harbored mutations in other cancers (22). The PCR conditions were the same for the two exons and are as follows: after a 5-min denature at 95 C, the reaction mixture was run for 35 cycles at 94 C, 64 C, and 72 C, each for 30 sec, followed by an elongation at 72 C for 10 min. After PCR amplification of the specific exons, Big-dye reaction was pursued for DNA sequencing as described previously (5).

### Detection of mutations in the PI3K/Akt and MAPK pathways

For *Ras*, *PIK3Ca*, *PTEN*, and *BRAF* genes, genomic DNA was amplified by using the same primers and PCR condition as described previously (5). For *PDK1* gene, exons 10 and 14 (kinase domain) were previously found to have mutations (26) and were analyzed here. A nested PCR procedure was used to amplify exon 10. The first round of PCR involved an initial 5-min denature at 95 C. The reaction mixture was then run for 35 cycles at 94 C, 62 C, and 72 C each for 30 sec, followed by an elongation at 72 C for 10 min. The product was diluted 1:100 and amplified for the second round with the second pairs of primers by using the same PCR condition. For exon 14, PCR was performed as follows: after a 5-min denature at 95 C, the reaction mixture was run for 35 cycles at 94 C, 60 C, and 72 C, each for 30 sec, followed by an elongation at 72 C for 10 min. For *AKT1* gene, mutations were previously reported in the pleckstrin homology domain in several human cancers. The primers and PCR conditions for amplifying this domain were as previously described (27), and we designed our own sequencing primer. For *AKT2* gene, most mutations were previously identified in exons 10 and 11 within its kinase domain (26). We designed primers for these two exons and used the following conditions to amplify them: exon 10 was amplified by using the same conditions as for the *PDK1* exon 14; for exon 11, we used nested PCR for amplification and the conditions were same as for *PDK1* exon 10 except for 60 C as the annealing temperature. The primers used in PCR amplification and Big-dye sequencing for these genes are summarized in Table 1.

### Analysis of gene copy number gains with quantitative real-time PCR

We used quantitative real-time PCR technique to analyze copy number of RTK genes and several genes in the PI3K/Akt and MAPK path-

**TABLE 1.** PCR primers and probes used in gene mutation and copy number analysis

| PCR primers used for gene mutation analysis |      |                  |                          |                          |                           |
|---------------------------------------------|------|------------------|--------------------------|--------------------------|---------------------------|
| Gene name                                   | Exon | Product size, bp | Forward primer (5'-3')   | Reverse primer (5'-3')   | Sequencing primer (5'-3') |
| EGFR                                        | 18   | 250              | ATGGTGAGGGCTGAGGTGAC     | TTGCAAGGACTCTGGGCTC      | CTCCACCAGACCATGAG         |
| EGFR                                        | 19   | 251              | AGCATGTGGCACCATCTCAC     | AGCAGGGTCTAGAGCAGAGCAG   | AGCAGGGTCTAGAGCAGAGCAG    |
| EGFR                                        | 20   | 367              | TGCGTTCACCTGGAAGG        | TCCCATGGCAAACTCTTG       | TCCCATGGCAAACTCTTG        |
| EGFR                                        | 21   | 388              | TCGACGTGGAGGGCTCAG       | GCAGCTCACCCAGAATG        | GCAGCTCACCCAGAATG         |
| PDGFR $\alpha$                              | 12   | 330              | TGCTGCTCAGTGAAGCTCTG     | GCAAAATTCATTCCTAGTTC     | GCAAATTCATTCCTAGTTC       |
| PDGFR $\alpha$                              | 18   | 326              | TGGATCAGCAGTCTTGCAG      | TGACCCCTGAAATCTATTGATG   | TGACCCCTGAAATCTATTGATG    |
| VEGFR2                                      | 26   | 368              | GCCTCTGGAGTATGGACTCTG    | TGGCTGAGAGATGGCATG       | GCCTCTGGAGTATGGACTCTG     |
| KIT                                         | 9    | 182              | AAAAGTATGCCACATCCCAAGTG  | CATGGTCAATGTTGAAATGAACT  | CATGGTCAATGTTGAAATGAACT   |
| KIT                                         | 11   | 127              | CGTAGCTGGCATGATGTC       | AAACAAAGGAAGCCACTGGAG    | CGTAGCTGGCATGATGTC        |
| PIK3Ca                                      | 9    | 487              | GATTGGTCTTCTCTCTCTG      | CCACAAATCAATTTACAACCAATG | TTGCTTTTTCTGAAATCATCTGTG  |
| PIK3Ca                                      | 20   | 525              | TGGGGTAAAGGGAATCAAAAAG   | CCTATGCAATCGGTCTTTG      | TGACATTTGAGCAAAAGACCTG    |
| PTEN                                        | 5    | 314              | TTATCTGAGGTATCTTTTACC    | CTCAGATCCAGGAAGGGA       | CTTATCTGAGGTATCTTTTACC    |
| PTEN                                        | 6    | 202              | TGGCTTCTCTTTTTTCTG       | ACATGGAAGGATGAGAATTC     | TGGCTTCTCTTTTTTCTG        |
| PTEN                                        | 7    | 428              | ACAGAATCCATATTCGTGTA     | TAATGTCACCAATGCCA        | ACAGAATCCATATTCGTGTA      |
| PTEN                                        | 8    | 159              | ACACATACATACATAAAGTC     | GTGCAGATAATGACAAGGAATA   | ACACATACATACATAAAGTC      |
| H-ras                                       | 3    | 109              | AGGTGGTCATTGATGGGAG      | AGGAAAGCCCTCCCGGTGG      | AGGAAAGCCCTCCCGGTGG       |
| K-ras                                       | 2    | 163              | GGCTGCTGAAAATGACTGAA     | GGTCTGCACACAGTAATATGC    | GGCTGCTGAAAATGACTGAA      |
| N-ras                                       | 1    | 252              | AAAGTACTGTAGATGGCTCGCC   | CAGAATATGGTAAAGATGATCCG  | CAGAATATGGTAAAGATGATCCG   |
| N-ras                                       | 3    | 174              | CTTACAGAAAACAAGTGT       | GTAGAGGTTAATCCCGAA       | CTTACAGAAAACAAGTGT        |
| PDK1                                        | 10.1 | 278              | TCACCTGGCAGTGACTTG       | GGGCATGAAGCCCAAGT        | TCATGAAGCCCAGTGCCAGC      |
| PDK1                                        | 10.2 | 269              | TGGCAGTACTTGTCTTGATTG    | CATGAAGCCAGTGCCAGC       | AATGCTGCAAGGTTTCCG        |
| PDK1                                        | 14   | 420              | CTTGTGTGAATAACCGTCACAC   | GTGGTGGGTGTTTTTTTCTC     | GCTGGAAAACACACAGGCTTGG    |
| AKT2                                        | 10   | 229              | CCAGCTGTCCAGGTAACC       | TAGTCAATGTCTCCAGCACCC    | GCTGGAAAACACACAGGCTTGG    |
| AKT2                                        | 11.1 | 574              | ATCAAGATCACTGACTTTGGCCTC | ACACACTGGACCCCTACAAG     | CCAGACCTGTGTGTTTCCAG      |
| AKT2                                        | 11.2 | 395              | GTGTGAGGCCAAGGGTAGG      | AGGGACAGTGGCAGCAGCTG     | CCAGACCTGTGTGTTTCCAG      |

  

| Primers and probes used in quantitative real-time PCR for gene copy number analysis |      |                  |                                |                                 |                                  |
|-------------------------------------------------------------------------------------|------|------------------|--------------------------------|---------------------------------|----------------------------------|
| Gene name                                                                           | Exon | Product size, bp | Forward primer (5'-3')         | Reverse primer (5'-3')          | Probe (5'-3')                    |
| EGFR                                                                                | 3    | 103              | CTG CAG ATC AGA GGA AAT ATG    | CAGTCCGGTTTTATTGTCATCATAG       | CAGAAAATCCTATGCCTTAG             |
| PDGFR $\alpha$                                                                      | 4    | 100              | TGTAGCCCTTTGACCTTAGGAATG       | AGGAGTCTCGGATCAGTTG             | ATGATGATCTGCCATTATACCCTTGTCCG    |
| PDGFR $\beta$                                                                       | 4    | 102              | ATGATCCGAGGAACTAATTCAT         | ACCAGCTGTGGTCTGTACTTC           | CACGGAAATAACTGAGATCA             |
| VEGFR1                                                                              | 9    | 90               | GTT ACC TGC GAC TGA GAA ATC TG | TAA TTC CCT GCA TCC TCT TCA GTT | CTAATTTGACTCTGGGTACT             |
| VEGFR2                                                                              | 30   | 100              | GGTACCAGTCCGGATATCAC           | CGGTTGACACTCCAATCTCT            | CCGATGACACAGACACACCCGTGTA        |
| MET                                                                                 | 2    | 100              | ACC TGC CAG CGA CAT GTC TT     | GAC ACT GGC TGG GCT CTT CTA TC  | CCACAATCATACTGTGACA              |
| KIT                                                                                 | 2    | 100              | TGA GAT CCT GGA TGA AAC GAA TG | GTG TTT GTT GGT GCA CGT GTA TT  | AAGCAGAATGAATGGATCAC             |
| PIK3Ca                                                                              | 21   | 81               | AAATGAAAAGCTCACTTGGATTCC       | TGTGCAATTCCTATGCAATCG           | CACTGCCTGTTAATAACTCTCAGCAGGCCAAA |
| PIK3Cb                                                                              | 5    | 100              | TGGAATGCTGCAAGATCAAG           | GGTGGTAATGGAAGGGAAGGAAAT        | CCATAGAGGCTGCCATAAATCGAAATTTCA   |
| PDK1                                                                                | 11   | 100              | AGGACAGCAACATAGACGATGAC        | CTTCTCAACAACAACCTCTTCT          | TTACAGATCTGGACTCGAACTCCCTTTG     |
| AKT1                                                                                | 5    | 100              | CAACGCCATCCAGACTGT             | TCCTCAGCCCTGATGTTGTC            | ACTTCCGGTGGGCTCCACC              |
| AKT2                                                                                | 11   | 100              | GGCTGGGTGTGGTCAATGTAC          | CGGATCTTCCATGAGGAT              | ACCACGAGCCCTCTCCGAGCT            |
| $\beta$ -actin                                                                      | 4    | 109              | TCACCCACACTGTGCCCATCTACGA      | TCGGTGAAGGATCTTCATGAGGTA        | ATGCCCTCCCCCATGCCATCC            |

ways, as listed in Table 1, using the ABI 7900HT PCR system (Applied Biosystems, Foster City, CA) following the manufacturer's instruction. Real-time PCR is a widely used robust and efficient method in genomic copy number gain analysis. This method was well established and used in gene copy number analysis for thyroid cancers in our and others' previous studies (4, 5, 7, 28). Specific primers and probes (Table 1) were designed using Primer Express 3.0 (Applied Biosystems) to amplify and detect both the specific genes and  $\beta$ -actin. The probes were labeled with 5' fluorescent reporter dye (6FAM) and 3' quencher dye (TAMRA). The reaction of quantitative real-time PCR for each gene was repeated twice, and  $\beta$ -actin was run in parallel to standardize the input DNA. Standard curve was established by using normal leukocyte DNA with a quantity range of 0.02–10 ng/ $\mu$ l.

### Analysis of *RET/PTC* rearrangement using RT-PCR

Formalin-fixed, paraffin-embedded tissue sections of anaplastic thyroid carcinoma were used for RNA extraction using the RNeasy FFPE Kit (QIAGEN, Valencia, CA) following the manufacturer's protocol. Three micrograms total RNA was reverse transcribed by using random hexamer primers and superscript IIRT (Invitrogen, Carlsbad, CA) following the manufacturer's instructions. The primers used for the analysis of *RET/PTC1* and *RET/PTC3* were as described previously (29). cDNA made from RNA extracted from TPC1 cell lines harboring *RET/PTC1* and cDNA from a tumor sample carrying *RET/PTC3* rearrangement (a kind gift from Dr. Yuri E Nikiforov, University of Pittsburgh, Pittsburgh, PA) were used as positive controls. All samples were assessed for the adequacy and integrity of RNA by amplification of the  $\beta$ -actin gene. The PCR products were electrophoresed on a 1.5% agarose for visualization by ethidium bromide.

### Analysis of phospho-ERK and phospho-Akt by immunohistochemistry

Tumor tissue sections were dewaxed, soaked in alcohol, and incubated in 3% hydrogen peroxide for 15 min to inactivate endogenous peroxidase activity after microwave treatment in an antigen-unmasking

solution (Vector Lab, Burlingame, CA). Tissue sections were then incubated overnight at 4 C with anti-phospho-ERK (Thr 202/Tyr 204) or anti-phospho-Akt (Ser473 IHC specific) antibodies from Cell Signaling Technology (Beverly, MA). Immunostaining was performed with Vectastain Universal Quick kit (Vector Lab) following the manufacturer's protocol. Peroxidase activity was revealed using 3,3 diaminobenzidine. Negative control was performed by omission of primary antibodies. For positive control we used samples from previously examined thyroid cancer tissues positive for phospho-ERK or phospho-Akt.

## Results

### Uncommon mutation but common copy number gain of RTK genes in thyroid cancers

RTK gene mutations have been reported in many human cancers. We selected the *EGFR*, *PDGFR $\alpha$* , *VEGFR2*, and *KIT* genes to analyze for thyroid cancers, which had been commonly found to be mutated in other cancers. As shown in Table 2, we did not find any mutation in the hot-spot exons of these genes in 51 ATC and 64 FTC samples, suggesting that RTK gene mutations are not common in ATC and FTC. In contrast, we found genomic copy number gains in many RTK genes with relatively high prevalences in these thyroid cancers. The prevalences of these copy gains were generally higher in ATC than FTC (Table 2).

### Common genetic alterations in the PI3K/Akt pathway in thyroid cancers

We and others had previously reported mutations in *Ras*, *PIK3Ca* and *PTEN* genes in the PI3K/Akt pathway (3–5, 7, 30).

**TABLE 2.** Prevalences of genetic alterations in ATC and FTC (n/N [%])

| Genetic alterations                           | Gene                                                | ATC (%)                   | FTC (%)      |
|-----------------------------------------------|-----------------------------------------------------|---------------------------|--------------|
| Copy number gain                              | <i>EGFR</i> <sup>15,16,17</sup>                     | 19/41 (46.3)              | 19/59 (32.2) |
|                                               | <i>PDGFR<math>\alpha</math></i> <sup>17,18,20</sup> | 11/46 (23.9)              | 4/52 (7.7)   |
|                                               | <i>PDGFR<math>\beta</math></i>                      | 14/37 (37.8)              | 8/59 (13.6)  |
|                                               | <i>VEGFR1</i>                                       | 20/44 (45.5)              | 26/59 (44.1) |
|                                               | <i>VEGFR2</i> <sup>17,20</sup>                      | 8/46 (17.4)               | 2/52 (3.8)   |
|                                               | <i>KIT</i> <sup>17,18,20</sup>                      | 10/46 (21.7)              | 6/61 (9.8)   |
|                                               | <i>MET</i> <sup>23,24</sup>                         | 5/42 (11.9)               | 5/58 (8.6)   |
|                                               | <i>PIK3Ca</i> <sup>5,7,30</sup>                     | 18/47 (38.3)              | 15/63 (23.8) |
|                                               | <i>PIK3Cb</i> <sup>32</sup>                         | 16/42 (38.1)              | 25/55 (45.5) |
|                                               | <i>PDK1</i>                                         | 8/40 (20)                 | 14/58 (24.1) |
|                                               | <i>AKT1</i>                                         | 9/48 (18.8)               | 5/61 (8.2)   |
|                                               | <i>AKT2</i>                                         | 0/44 (0)                  | 13/58 (22.4) |
|                                               | Mutation                                            | <i>EGFR</i> <sup>16</sup> | 0/47 (0)     |
| <i>PDGFR<math>\alpha</math></i> <sup>19</sup> |                                                     | 0/47 (0)                  | 0/64 (0)     |
| <i>VEGFR2</i> <sup>21</sup>                   |                                                     | 0/47 (0)                  | 0/64 (0)     |
| <i>KIT</i> <sup>22</sup>                      |                                                     | 0/47 (0)                  | 0/64 (0)     |
| <i>PIK3Ca</i> <sup>3,7</sup>                  |                                                     | 6/50 (12)                 | 4/64 (6.3)   |
| <i>RAS</i> <sup>5,7,12,13,30</sup>            |                                                     | 4/51 (7.8)                | 13/64 (20.3) |
| <i>PTEN</i> <sup>5,7,30</sup>                 |                                                     | 8/48 (16.7)               | 3/64 (4.69)  |
| <i>PDK1</i> <sup>26</sup>                     |                                                     | 0/47 (0)                  | 0/64 (0)     |
| <i>AKT1</i> <sup>27</sup>                     |                                                     | 0/47 (0)                  | 0/64 (0)     |
| <i>AKT2</i> <sup>26</sup>                     |                                                     | 0/47 (0)                  | 0/64 (0)     |
| <i>BRAF</i> <sup>4,6,7</sup>                  | 14/50 (28)                                          |                           |              |
| Rearrangement                                 | <i>RET/PTC</i> <sup>29</sup>                        | 3/20 (15)                 |              |

Numbers in superscript are references that represent some previous studies in which the indicated genetic alterations had been investigated in other cancers or, in some cases, also thyroid cancers. n, The number of cases positive for the genetic event; N, the number of cases examined for the genetic event.

Here we extended the mutation analysis to include several other important genes in the PI3K/Akt pathway and also examined their genomic copy number. We found no mutation in the hot-spot exons of *PDK1*, *AKT1*, and *AKT2* genes in all the ATC and FTC specimens (Table 2). Mutations were relatively common in the *PIK3Ca* and *PTEN* genes in ATC and in the *Ras* gene in FTC. Copy number gains were common in the *PIK3Ca*, *PIK3Cb*, and *PDK1* genes but not in *Akt1* and *Akt2* genes in ATC and FTC (Table 2).

### **BRAF mutation and RET/PTC rearrangement in the MAPK pathway in ATC**

*BRAF* mutation and *RET/PTC* rearrangements are the most common activating genetic alterations in the MAPK pathway in thyroid cancer. Because they virtually do not occur in FTC, we analyzed them only in ATC samples. *BRAF* mutation was present in 14 of 50 ATC (28%). We had 20 ATC samples available for RNA extraction that were successfully analyzed for *RET/PTC* rearrangements. One of the 20 samples (5%) harbored *RET/PTC1* and two of 20 samples (10%) harbored *RET/PTC3* rearrangement, with an overall prevalence of three of 20 (15%). Two of these three ATC samples also contained PTC tissues, and it is therefore possible that *RET/PTC* in these two samples could actually be from PTC. One ATC sample harbored both *BRAF* mutation and *RET/PTC* rearrangement.

### **High prevalence of overall genetic alterations in thyroid cancers**

Taking together, in all the RTK genes and the genes in the PI3K/Akt and MAPK pathways examined in this study, we found at least one mutation in 26 of 51 ATC (51%) and 17 of 64 FTC (26.6%) and at least one copy number gain in 41 of 51 ATC (80.4%) and 51 of 64 FTC (79.7%). Taking together, all the genetic alterations, including mutation and copy gain, 46 of 51 ATC (90.2%) and 55 of 64 FTC (85.9%) harbored at least one genetic alteration. Due to insufficient tumor or DNA specimens, some samples only had a partial analysis for some of the genetic alterations. When excluding these samples but including only the samples that had complete data, 46 of 48 ATC (95.8%) and 55 of 59 FTC (93.2%) harbored at least one genetic alteration. Coexistence of genetic alterations was common; 37 of 51 ATC (72.5%) and 41 of 64 FTC (64.1%) harbored two or more genetic events. When the cases without complete data on all the genes were excluded, coexistence of genetic alterations (two or more) was found in 37 of 48 ATC (77.1%) and 41 of 59 FTC (69.5%). This coexistence involved mostly copy gains (Tables 3–5). Gene mutations were largely mutually exclusive among themselves in both ATC and FTC; 20 of 26 ATC (76.9%) and 14 of 17 FTC (82.4%) that harbored mutations harbored only one mutation in individual tumors (Tables 3 and 4).

### **High prevalence of genetic alterations that could activate both PI3K/Akt and MAPK pathways in ATC**

When considering the cases harboring genetic alterations in RTKs or Ras that can dually activate the PI3K/Akt and MAPK pathways and the cases concurrently harboring other genetic alterations that can activate both pathways (e.g. coexistence of

*PIK3Ca* copy gain and *BRAF* mutation), 39 of 51 (76.5%) ATC harbored genetic alterations that could potentially activate both pathways (Table 3). If the three cases of ATC without complete genetic analysis were excluded, 39 of 48 (81.3%) ATC harbored genetic alterations that could potentially activate both pathways.

### **Relationship of genetic alterations with phosphorylation of Akt and ERK1/2 in ATC and FTC**

To explore the relevance of genetic alterations in the PI3K/Akt and MAPK pathways in activating the two pathways, we performed immunohistochemical analysis of phosphorylation of Akt (p-Akt) and phosphorylation of ERK (p-ERK) in selected tumor tissues (Fig. 1). We examined 27 ATC samples available for this analysis. Representative cases of immunohistochemical staining are shown in Fig. 1 and detailed data are summarized in Table 5. When looking at the phosphorylation of proteins and its relationship with genetic alterations, 16 of 27 ATC (59.3%) showed p-Akt immunoreactivity, and of the 16 p-Akt samples, 13 (81.3%) harbored genetic alterations in the PI3K/Akt pathway. Eight of 27 ATC (29.6%) showed p-ERK1/2 immunoreactivity and all the eight samples (100%) harbored genetic alterations in the MAPK pathway. Six of 27 ATC (22.2%) showed immunoreactivity for both p-Akt and p-ERK1/2, and all six samples (100%) harbored genetic alterations in both PI3K/Akt and MAPK pathways. Thus, most of the ATC tumors that were positive for p-Akt or p-ERK1/2 immunoreactivity correspondingly harbored genetic alterations in the PI3K/Akt or MAPK pathway, consistent with the expected function of these genetic alterations.

When looking at the specific genetic alterations and their relationship with the activation of PI3K/Akt and MAPK pathways as shown in Table 5, five of seven ATC (71.4%) that harbored *BRAF* mutation showed immunoreactivity for p-ERK1/2. In PI3K/Akt pathway, 10 of 15 ATC (66.6%) with *PIK3Ca* copy gain, four of seven ATC (57.1%) with *PIK3Cb* copy gain and three of five ATC (60%) with *PDK1* copy gain showed p-Akt immunoreactivity. Both of the two cases of ATC with *PTEN* mutation stained positively for p-Akt. Thus, the genetic alterations in the PI3K/Akt pathway were mostly associated with p-Akt, reflecting the activation of this pathway. Among the RTK genes, eight of 11 (72.7%) and four of 11 ATC with *EGFR* copy gains (36.4%), three of four (75%) and one of four ATC with *PDGFR $\alpha$*  copy gains (25%), seven of 10 (70%) and four of 10 ATC with *VEGFR1* copy gains (40%), and three of four (75%) and two of four ATC with *VEGFR2* copy gains (50%) showed p-Akt and p-ERK1/2 immunoreactivity, respectively. These data showed clearly a preferential activation of the PI3K/Akt pathway over the MAPK pathway by the RTK gene copy number gains. A few genetic alterations, such as copy gains of *PDGFR $\beta$* , *KIT*, *MET*, *AKT1*, and *AKT2* genes were less commonly associated with p-Akt or p-ERK1/2 (Table 5). In fact, nine of 27 ATC (33.3%) did not show either p-Akt or p-ERK1/2 immunoreactivity, although all nine samples harbored at least one genetic alteration (Table 5). Two cases showed p-Akt immunoreactivity, but no genetic alterations were identified in them, consistent with possibly a yet unidentified genetic alteration in the PI3K signaling pathway in these tumors.

We similarly performed immunohistostaining analysis for p-

**TABLE 3.** Genetic alterations in individual ATC samples

| Sample | EGFR  | PDGFR $\alpha$ | PDGFR $\beta$ | VEGFR1 | VEGFR2 | KIT    | MET   | PIK3Ca | PIK3Cb | PDK1  | AKT1  | AKT2 | Mutation |        |      | RET/PTC |
|--------|-------|----------------|---------------|--------|--------|--------|-------|--------|--------|-------|-------|------|----------|--------|------|---------|
|        |       |                |               |        |        |        |       |        |        |       |       |      | Ras      | PIK3Ca | PTEN |         |
| A1     | 5.0/+ | 3.1            |               | 27.7/+ | 3.9/+  | 13.6/+ |       | 8.3/+  | 5.5/+  | 1.1   | 3.6/+ |      |          |        |      |         |
| A2     | 2.3   | 4.9/+          | 3.0           | 2.5    | 3.2    | 1.9    | 1.7   | 3.9/+  | 3.1    | 2.1   | 2.4   | 2.1  |          |        |      |         |
| A3     | 2.5   | 4.5/+          | 2.6           | 2.6    | 2.7    | 1.9    | 1.3   | 3.1    | 3.2    | 2.9   | 2.9   | 2.1  |          |        |      |         |
| A4     | 4.8/+ | 2.3            | 3.5/+         | 8.9/+  | 2.3    | 5.5/+  | 2.6   | 5.2/+  | 4.1/+  | 0.8   | 3.3   | 2.8  |          |        |      |         |
| A5     | 2.6   | 2.1            | 2.1           | 2.8    | 1.4    | 1.6    | 1.1   | 2.9    | 2.7    | 2.4   | 2.7   | 1.8  |          |        |      |         |
| A6     | 3.7/+ | 2.0            | 2.7           | 2.9    | 1.9    | 2.1    | 1.9   | 4.5/+  | 2.4    | 3.0   | 2.7   | 2.2  |          |        |      | +       |
| A7     | 3.7/+ | 2.9            | 4.3/+         | 2.9    | 2.6    | 2.0    | 1.7   | 3.9/+  | 3.1    | 3.6/+ | 3.0   | 2.4  |          |        |      |         |
| A8     | 2.2   | 3.4            | 2.4           | 2.7    | 2.8    | 1.8    | 1.8   | 2.5    |        |       |       |      |          |        |      |         |
| A9     | 3.2   | 3.2            | 4.4/+         | 2.5    | 1.9    | 1.8    | 1.8   |        |        |       |       |      |          |        |      |         |
| A10    | 3.6/+ | 1.7            |               | 3.8/+  | 3.6/+  | 2.9    | 2.9   | 4.7/+  | 4.5/+  | 2.6   | 2.7   | 2.2  |          |        |      |         |
| A11    | 3.0   | 1.4            | 2.7           | 2.4    | 1.3    | 1.4    | 2.0   | 2.7    | 2.0    | 3.1   | 2.7   | 1.9  |          |        |      |         |
| A12    | 3.3   | 3.1            | 4.6/+         | 3.6/+  | 2.5    | 2.1    | 2.1   | 4.5/+  | 2.9    | 3.7/+ | 3.3   | 2.3  |          |        |      |         |
| A13    |       |                |               |        |        |        |       |        | 4.1/+  | 2.8   | 2.1   |      |          |        |      |         |
| A14    | 4.0/+ |                | 3.4           | 5.2/+  | 2.3    | 2.4    | 1.3   | 4.8/+  | 2.9    | 3.2   | 3.2   | 2.1  |          |        |      |         |
| A15    | 4.5/+ | 1.8            |               | 5.2/+  | 3.9/+  | 1.8    | 1.7   | 6.5/+  | 5.8/+  | 1.9   | 3.3   | 2.5  |          |        |      |         |
| A16    |       | 4.2/+          |               |        | 3.2    |        |       |        | 5.3/+  | 6.1/+ | 3.1   | 2.7  |          |        |      |         |
| A17    |       | 1.7            |               |        | 2.9    | 5.3/+  |       | 4.2/+  |        | 2.7   | 2.1   |      |          |        |      |         |
| A18    | 4.4/+ | 1.8            | 2.8           | 2.9    | 2.6    | 1.8    | 2.2   | 2.3    | 3.0    | 2.6   | 3.4   | 2.0  |          |        |      |         |
| A19    | 2.5   | 3.2            |               | 2.8    | 2.1    | 1.9    | 1.6   | 4.4/+  | 3.0    | 1.9   | 2.6   | 2.6  |          |        |      |         |
| A20    | 8.1/+ | 6.7/+          | 5.3/+         | 7.7/+  | 1.9    | 4.3/+  | 8.7/+ |        | 5.0/+  | 5.7/+ | 3.8/+ | 2.3  |          |        |      |         |
| A21    | 2.0   | 2.9            | 2.1           | 2.4    | 2.3    | 2.4    | 2.2   | 2.7    | 2.9    | 4.5/+ | 2.7   | 2.0  |          |        |      |         |
| A22    | 4.4/+ |                | 3.0           | 4.4/+  |        | 1.7    | 1.3   | 3.6/+  | 4.3/+  |       | 2.6   | 2.4  |          |        |      |         |
| A23    | 2.2   | 2.2            |               | 2.4    | 2.0    | 1.3    | 1.3   | 1.8    | 2.5    | 1.3   | 2.8   | 1.6  |          |        |      |         |
| A24    | 4.9/+ | 5.1/+          | 4.1/+         | 5.4/+  | 3.9/+  | 2.7    | 2.7   | 7.3/+  | 3.2    | 2.6   | 3.3   | 3.0  |          |        |      |         |
| A25    | 2.5   | 2.4            | 1.9           | 2.6    | 2.2    | 1.9    | 2.2   | 2.8    | 3.0    | 4.3/+ | 2.7   | 2.0  |          |        |      |         |
| A26    | 4.5/+ | 2.3            | 3.2           | 6.0/+  |        | 2.6    | 2.2   | 4.5/+  | 3.4    | 1.8   | 2.2   | 2.0  |          |        |      |         |
| A27    | 3.8/+ | 2.9            | 2.8           | 4.8/+  | 3.4    | 2.2    | 2.0   | 4.9/+  | 2.8    | 1.2   | 2.5   | 2.2  |          |        |      |         |
| A28    | 2.2   | 1.8            | 2.5           | 3.1    | 1.8    | 1.8    | 1.8   | 2.3    | 2.9    | 2.7   | 2.7   | 2.0  |          |        |      |         |
| A29    |       | 1.8            |               |        | 2.9    |        |       | 3.0    | 2.3    |       | 3.9/+ | 2.3  |          |        |      |         |
| A30    | 6.6/+ |                | 8.4/+         | 16.3/+ |        |        |       | 12.9/+ |        |       | 6.6/+ | 2.1  |          |        |      |         |
| A31    | 5.3/+ | 1.9            | 5.9/+         | 6.6/+  | 3.0    | 5.7/+  | 1.6   | 1.7    | 3.8/+  |       | 6.3/+ | 3.4  |          |        |      |         |
| A32    | 5.9/+ | 2.6            | 2.8           | 5.3/+  | 3.1    | 2.5    | 3.3   | 2.0    |        |       | 3.7/+ | 1.9  |          |        |      |         |
| A33    | 2.7   | 2.4            | 2.5           | 3.3    | 2.2    | 2.4    | 1.8   | 2.3    | 3.0    | 1.7   | 2.9   | 2.1  |          |        |      |         |
| A34    | 2.8   | 2.6            | 2.2           | 2.2    | 1.9    | 2.3    | 2.9   | 1.8    | 2.6    | 2.2   | 2.4   | 2.8  |          |        |      |         |
| A35    | 2.1   | 3.3            | 1.7           | 2.2    | 1.6    | 1.7    | 1.7   | 2.3    | 2.5    | 1.5   | 2.1   | 1.7  |          |        |      |         |
| A36    |       | 1.1            |               | 5.7/+  | 4.0/+  | 2.7    | 3.5/+ | 1.8    |        | 1.3   | 2.8   |      |          |        |      |         |
| A37    |       | 3.8/+          | 4.0/+         | 6.1/+  | 2.3    | 3.6/+  | 4.5/+ | 3.2    | 4.7/+  | 1.7   | 1.9   | 2.2  |          |        |      |         |
| A38    | 3.8/+ | 2.1            | 4.3/+         | 4.7/+  | 2.4    | 3.3    |       | 1.8    | 2.8    | 1.1   | 2.5   |      |          |        |      |         |
| A39    | 3.1   | 2.1            | 2.5           | 2.8    | 2.2    | 2.0    | 1.3   | 2.5    | 2.9    | 1.6   | 2.5   | 2.2  |          |        |      |         |
| A40    |       | 3.3            | 2.9           |        | 3.3    | 6.9/+  |       | 2.7    | 3.6/+  | 2.9   | 2.4   | 1.8  |          |        |      |         |
| A41    | 5.3/+ | 6.5/+          |               | 5.6    | 5.4/+  | 5.0/+  | 8.6/+ | 10.4/+ | 4.5/+  |       | 5.0/+ | 2.6  |          |        |      |         |
| A42    | 2.9   | 4.1/+          | 4.5/+         | 2.8    | 2.2    | 1.8    | 1.3   | 2.8    | 4.0/+  | 2.9   | 2.9   | 2.0  |          |        |      |         |
| A43    | 2.4   | 4.0/+          |               | 3.4    | 3.0    | 2.4    | 1.1   | 3.3    |        | 1.4   | 3.7/+ | 2.6  |          |        |      |         |
| A44    | 3.1   | 2.2            | 4.7/+         | 2.7    | 2.0    | 1.6    | 1.5   | 2.5    | 3.8/+  | 1.7   | 2.9   | 2.0  |          |        |      |         |
| A45    | 2.9   | 3.9/+          | 3.9/+         | 3.3    | 2.0    | 2.0    | 2.0   | 2.0    |        | 3.4   | 2.2   | 2.2  |          |        |      |         |
| A46    | 4.9/+ | 4.1/+          | 8.4/+         | 8.4/+  | 3.5/+  | 4.2/+  | 7.5/+ | 9.3/+  | 2.6    | 4.6/+ | 3.4   | 2.5  |          |        |      |         |
| A47    | 1.8   | 3.2            | 3.0           | 2.4    | 2.4    | 6.8/+  | 2.1   | 1.7    | 3.6/+  | 1.8   | 2.1   | 2.1  |          |        |      |         |
| A48    | 4.0/+ | 1.2            | 4.3/+         | 3.5/+  | 2.9    | 3.0    | 1.2   | 2.0    |        | 1.0   | 3.6/+ | 1.9  |          |        |      |         |
| A49    |       |                |               |        |        |        |       | 3.1    |        |       |       |      |          |        |      |         |
| A50    | 2.6   | 1.7            | 2.0           | 2.7    | 1.9    | 1.8    | 1.7   | 1.5    | 3.9/+  | 1.4   | 1.9   | 2.5  |          |        |      |         |
| A51    | 1.3   | 6.5/+          | 2.8           | 1.5    | 3.9/+  | 3.3    | 1.5   | 3.3    | 2.6    | 3.4   | 2.3   | 2.1  |          |        |      |         |

The numerical values represent copy numbers of the indicated genes. Gene copy number gain, as designated with a +, is defined as a copy number of 4 (rounded up from 3.5 to 3.9) or higher.

**TABLE 4.** Genetic alterations in individual FTC samples

|     | EGFR             | PDGFR $\alpha$ | PDGFR $\beta$ | VEGFR1 | VEGFR2 | KIT    | MET    | PIK3Ca | PIK3Cb | PDK1  | AKT1  | AKT2  | Ras      | PIK3Ca | PTEN |
|-----|------------------|----------------|---------------|--------|--------|--------|--------|--------|--------|-------|-------|-------|----------|--------|------|
|     | Copy number gain |                |               |        |        |        |        |        |        |       |       |       | Mutation |        |      |
| F1  | 3.0              |                | 2.7           | 2.4    | 1.5    | 1.6    | 1.8    | 2.6    | 2.8    | 3.6/+ | 3.5/+ | 2.6   |          |        |      |
| F2  | 4.2/+            |                | 2.9           | 3.7/+  |        | 2.1    | 2.0    | 3.4    | 4.3/+  | 4.4/+ | 2.8   | 3.1   |          |        |      |
| F3  | 3.2              | 2.3            | 2.3           | 3.2    | 1.9    | 2.1    | 1.8    | 2.2    | 3.7/+  | 3.2   | 3.1   | 2.9   | +        |        |      |
| F4  | 3.7/+            |                | 3.2           | 5.2/+  |        | 3.4    | 2.3    | 3.3    | 4.8/+  | 3.7/+ | 3.0   | 3.4   | +        |        |      |
| F5  | 5.0/+            | 4.4/+          | 3.9/+         | 5.4/+  | 3.1    | 2.1    | 2.6    | 2.9    | 5.2/+  | 2.7   | 2.8   | 4.8/+ |          |        |      |
| F6  | 3.9/+            | 1.6            | 2.8           | 4.7/+  |        | 2.3    | 2.1    | 2.6    | 4.2/+  | 4.8/+ | 3.0   | 3.0   |          |        |      |
| F7  | 3.1              |                | 2.6           | 3.7/+  |        | 2.2    | 1.8    | 1.8    | 3.6/+  | 3.2   | 2.5   | 3.1   |          |        | +    |
| F8  | 4.0/+            | 1.8            | 2.4           | 3.6/+  | 2.7    | 2.4    | 2.1    | 3.2    | 3.2    | 2.8   | 2.1   | 3.2   |          |        |      |
| F9  | 4.1/+            |                | 2.5           | 3.2    |        | 2.3    | 2.5    | 3.3    | 4.0/+  | 3.1   | 2.8   | 2.7   |          |        |      |
| F10 | 2.2              | 2.5            | 2.4           | 2.4    | 2.9    | 2.0    | 1.9    | 1.5    | 2.7    | 4.6/+ | 2.6   | 2.4   |          |        |      |
| F11 | 1.7              | 2.4            | 1.7           | 2.8    | 2.3    | 2.8    | 1.8    | 1.7    | 2.5    | 3.5/+ | 2.5   | 2.3   | +        | +      |      |
| F12 | 1.4              | 2.0            | 1.5           | 2.0    | 2.1    | 1.7    | 1.4    | 1.9    | 2.6    | 2.8   | 2.2   | 2.4   |          |        |      |
| F13 | 2.6              | 1.3            |               | 4.2/+  | 1.5    | 1.8    | 1.6    | 2.3    | 4.9/+  | 2.5   | 2.8   | 3.2   | +        |        |      |
| F14 | 3.2              | 2.4            | 2.1           | 3.1    | 1.6    | 2.1    | 2.8    | 2.9    |        | 2.1   | 1.8   | 2.0   |          |        |      |
| F15 | 3.7/+            | 3.1            | 1.8           | 3.8/+  |        | 2.5    | 2.2    | 2.7    | 3.3    | 1.5   | 1.6   | 2.5   |          |        |      |
| F16 |                  |                |               |        |        |        |        | 2.2    |        |       |       |       |          |        |      |
| F17 | 2.1              |                | 2.1           | 2.5    | 2.1    | 1.8    | 1.6    | 1.6    | 2.2    | 2.8   | 2.3   | 3.0   |          |        |      |
| F18 | 2.3              | 3.2            | 1.9           | 3.3    | 14.8/+ | 2.2    | 1.5    | 2.6    | 2.8    | 2.3   | 2.5   | 2.5   |          |        |      |
| F19 | 1.6              | 2.5            | 2.4           | 2.1    | 1.8    | 2.2    | 2.3    | 1.6    | 2.2    | 2.4   | 2.0   | 2.7   |          |        |      |
| F20 | 2.3              |                | 2.4           | 2.8    | 2.3    | 2.2    | 1.7    | 2.3    | 2.3    | 2.8   | 2.6   | 2.7   |          |        |      |
| F21 | 1.6              | 2.0            | 2.2           | 2.0    | 2.0    | 2.4    | 2.1    | 1.5    | 1.9    |       | 2.2   | 2.5   | +        |        |      |
| F22 | 2.4              | 2.5            | 2.2           | 2.3    | 2.6    | 2.6    | 2.5    | 1.4    | 2.2    | 4.5/+ | 2.5   | 3.0   | +        |        |      |
| F23 | 2.7              | 1.8            | 2.1           | 2.5    | 3.5/+  | 2.9    | 2.3    | 1.9    | 2.5    | 3.3   | 2.2   | 2.8   |          |        |      |
| F24 | 2.0              | 2.7            | 3.1           | 2.2    | 2.2    | 1.8    | 1.7    | 1.2    | 1.9    | 2.4   | 1.2   | 2.2   |          |        |      |
| F25 | 3.6/+            | 1.9            | 2.2           | 2.0    | 2.8    | 2.2    | 1.8    | 1.2    | 1.9    |       | 1.9   | 2.2   |          |        |      |
| F26 | 2.2              | 2.3            | 1.9           | 1.9    | 2.1    | 1.9    | 1.6    | 1.0    | 1.9    | 2.5   | 1.7   | 2.1   | +        |        |      |
| F27 | 2.2              | 2.4            | 2.5           | 2.3    | 2.5    | 2.9    | 2.3    | 1.7    | 2.8    | 4.3/+ | 2.7   | 2.4   |          |        |      |
| F28 | 9.4/+            | 5.8/+          |               | 8.1/+  |        | 3.9/+  | 1.8    | 2.0    | 4.4/+  |       | 5.8/+ | 6.1/+ |          |        |      |
| F29 | 3.6/+            | 2.9            | 2.2           | 2.8    | 2.5    | 3.0    | 1.6    | 3.4    | 3.4    | 3.5/+ | 2.5   | 1.9   | +        |        |      |
| F30 | 2.5              | 3.0            | 2.3           | 2.5    | 3.0    | 2.2    | 1.6    | 3.3    | 2.8    | 3.9/+ | 2.4   | 2.3   |          |        |      |
| F31 | 2.1              | 2.3            | 1.7           | 2.3    | 2.5    | 1.8    | 1.7    | 2.0    | 1.9    | 2.3   | 1.9   | 2.6   |          |        |      |
| F32 | 3.6/+            | 2.3            | 3.8/+         | 4.2/+  | 2.8    | 2.4    | 1.5    | 2.4    | 4.7/+  | 2.2   | 3.6/+ | 4.2/+ |          | +      | +    |
| F33 | 3.4              | 2.6            | 2.8           | 3.8/+  | 2.1    | 2.2    | 1.7    | 3.1    | 4.3/+  |       | 2.9   | 4.4/+ |          |        |      |
| F34 | 3.2              | 2.4            | 4.1/+         | 5.0/+  | 2.4    | 2.6    | 2.1    | 5.7/+  | 3.6/+  | 3.2   | 3.8/+ | 4.3/+ |          |        | +    |
| F35 | 2.7              | 2.0            | 3.3           | 3.7/+  | 2.0    | 2.6    | 1.7    | 3.2    | 2.3    | 2.9   | 2.7   | 3.3   | +        |        | +    |
| F36 | 2.7              | 2.0            | 3.0           | 3.9/+  | 2.5    | 1.4    | 2.3    | 3.4    | 3.0    | 2.6   | 2.6   | 3.6/+ |          |        |      |
| F37 | 3.6/+            | 2.1            | 3.2           | 3.8/+  | 2.7    | 2.3    | 1.9    | 3.8/+  | 4.7/+  | 3.6/+ | 3.5/+ | 3.7/+ |          |        |      |
| F38 | 3.1              | 2.8            | 3.4           | 3.3    | 2.7    | 2.3    | 1.8    | 3.2    | 2.0    | 2.8   | 2.7   | 2.8   |          | +      |      |
| F39 | 4.5/+            | 2.0            | 4.8/+         | 4.1/+  | 1.8    | 1.9    | 3.1    | 4.1/+  | 4.1/+  | 2.6   | 2.7   | 4.7/+ |          |        |      |
| F40 | 3.2              | 2.7            | 3.6/+         | 4.1/+  | 3.0    | 2.7    | 1.6    | 4.5/+  | 3.9/+  | 2.6   | 3.1   | 3.4   | +        |        |      |
| F41 | 5.9/+            |                | 3.6/+         | 6.1/+  | 2.1    | 2.0    | 2.7    | 5.3/+  | 7.5/+  | 3.2   | 3.1   | 6.6/+ |          |        |      |
| F42 |                  |                |               |        |        |        |        | 4.5/+  | 19.9/+ | 0.8   |       |       |          |        |      |
| F43 | 2.8              | 2.2            | 2.2           | 2.7    | 2.1    | 2.1    | 2.2    | 4.5/+  | 3.4    | 2.4   | 2.5   | 3.1   | +        |        |      |
| F44 | 2.9              | 2.5            | 2.6           | 4.0/+  | 1.7    | 2.1    | 1.9    | 4.5/+  |        | 3.4   | 3.0   | 4.8/+ |          |        |      |
| F45 | 2.9              | 2.9            | 2.3           | 3.6/+  | 2.2    | 4.8/+  | 9.8/+  | 2.4    | 4.0/+  | 1.8   | 2.0   | 2.9   |          |        |      |
| F46 |                  | 1.5            | 2.7           |        | 1.7    | 3.1    |        | 2.6    |        | 2.0   | 2.8   | 3.9/+ |          | +      |      |
| F47 |                  | 2.6            | 1.3           |        | 1.9    |        |        | 3.9/+  | 5.9/+  | 1.8   | 1.7   | 2.6   |          |        |      |
| F48 | 2.7              | 2.1            | 2.0           | 3.3    | 2.5    | 2.5    | 2.4    | 3.9/+  | 6.2/+  | 2.5   | 2.4   | 2.9   |          |        |      |
| F49 | 5.1/+            | 2.8            | 2.4           | 2.8    | 3.0    | 2.7    | 2.7    | 4.3/+  | 4.1/+  | 2.0   | 2.3   | 3.4   |          |        |      |
| F50 | 2.7              | 2.2            | 2.0           | 2.6    | 1.8    | 2.3    | 2.3    | 3.2    | 2.2    | 2.2   | 2.1   | 2.1   | +        |        |      |
| F51 | 3.8/+            | 2.5            | 2.7           | 3.0    | 2.2    | 3.7/+  |        | 3.4    | 4.8/+  | 2.5   | 2.7   | 3.8/+ | +        |        |      |
| F52 | 3.0              | 3.9/+          | 1.7           | 2.5    | 3.3    | 2.1    | 2.2    | 2.7    | 3.1    | 2.1   | 1.8   | 3.0   |          |        |      |
| F53 |                  | 3.1            |               |        | 2.4    | 4.0/+  | 4.0/+  | 2.5    | 3.4    | 4.1/+ | 3.1   |       |          |        |      |
| F54 | 3.0              | 2.8            | 2.0           | 2.1    |        | 3.0    | 2.4    | 2.2    | 2.5    | 2.4   | 2.0   | 2.6   |          |        |      |
| F55 | 4.4/+            | 1.4            | 2.4           | 3.1    |        | 15.2/+ | 21.4/+ | 3.3    |        | 2.5   | 2.6   |       |          |        |      |
| F56 | 3.2              | 2.5            | 2.9           | 5.3/+  | 2.2    | 2.8    | 2.4    | 4.5/+  | 3.9/+  | 4.5/+ | 3.4   | 4.7/+ |          |        |      |
| F57 | 4.9/+            | 2.3            | 2.5           | 4.6/+  | 2.0    | 2.1    | 2.9    | 1.7    |        | 2.2   | 2.4   |       |          |        |      |
| F58 | 3.2              | 1.9            | 3.3           | 2.8    | 1.8    | 2.9    | 2.9    | 4.0/+  |        | 1.9   | 1.9   | 3.2   |          |        |      |
| F59 | 3.0              | 2.5            | 1.9           | 3.4    | 2.0    | 7.4/+  | 4.8/+  | 4.9/+  | 4.6/+  | 3.0   | 2.2   | 2.2   |          |        |      |
| F60 | 4.7/+            |                | 2.8           | 6.7/+  |        | 3.3    | 4.0/+  | 2.7    |        |       |       |       |          |        |      |
| F61 | 2.9              | 2.2            | 4.2/+         | 4.8/+  | 2.4    | 3.4    | 2.9    | 2.1    | 4.8/+  | 3.2   | 3.0   | 2.7   |          |        |      |
| F62 | 3.3              | 2.2            | 2.5           | 3.6/+  | 1.6    | 1.8    | 2.4    | 2.3    | 1.9    | 2.2   | 3.2   | 2.8   |          |        |      |
| F63 | 1.8              |                | 4.5/+         | 2.7    | 1.6    | 3.1    |        | 2.5    |        | 2.0   | 2.5   | 2.6   |          |        |      |
| F64 | 3.3              | 3.7/+          | 3.4           | 4.3/+  | 1.5    | 2.3    | 2.7    | 4.5/+  | 2.1    | 4.0/+ | 2.9   | 3.0   |          |        |      |

The numerical values represent copy numbers of the indicated genes. Gene copy number gain, as designated with a +, is defined as a copy number of 4 (rounded up from 3.5–3.9) or higher.

**TABLE 5.** Immunohistochemical staining of p-Akt and p-ERK and corresponding genetic alterations in individual ATC and FTC samples

|     | Immunohistochemistry |       | Genetic alterations                                           |              |               |
|-----|----------------------|-------|---------------------------------------------------------------|--------------|---------------|
|     | p-Akt                | p-ERK | Copy number gain                                              | Mutation     | Rearrangement |
| A1  | +                    | +     | EGFR, VEGFR1, VEGFR2, KIT, PIK3Ca, PIK3Cb, AKT1               | BRAF         |               |
| A2  | +                    | –     | PDGFR $\alpha$ , PIK3Ca                                       |              |               |
| A3  | +                    | –     | PDGFR $\alpha$                                                |              |               |
| A4  | –                    | –     | EGFR, PDGFR $\beta$ , VEGFR1, KIT, PIK3Ca, PIK3Cb             |              |               |
| A5  | –                    | –     |                                                               | PIK3Ca, RAS  |               |
| A6  | +                    | +     | PIK3Ca                                                        | PIK3Ca, BRAF | RET/PTC3      |
| A7  | +                    | –     | EGFR, PDGFR $\beta$ , PIK3Ca, PDK1                            |              |               |
| A8  | +                    | –     |                                                               |              | RET/PTC1      |
| A9  | –                    | –     | PDGFR $\beta$                                                 | BRAF         |               |
| A10 | +                    | –     | EGFR, VEGFR1, VEGFR2, PIK3Ca, PIK3Cb                          |              |               |
| A11 | +                    | –     |                                                               |              |               |
| A12 | +                    | –     | PDGFR $\beta$ , VEGFR1, PIK3Ca, PDK1                          |              |               |
| A13 | –                    | –     | PIK3Cb                                                        |              |               |
| A14 | +                    | +     | EGFR, VEGFR1, PIK3Ca                                          | BRAF         |               |
| A15 | +                    | +     | EGFR, VEGFR1, VEGFR2, PIK3Ca, PIK3Cb                          |              |               |
| A16 | +                    | +     | PDGFR $\alpha$ , PIK3Cb, PDK1                                 | PTEN         |               |
| A17 | –                    | –     | KIT, PIK3Ca                                                   | BRAF         |               |
| A18 | +                    | –     | EGFR                                                          | PTEN         |               |
| A19 | –                    | –     | PIK3Ca                                                        |              |               |
| A21 | –                    | –     | PDK1                                                          |              | RET/PTC3      |
| A22 | –                    | –     | EGFR, VEGFR1, PIK3Ca, PIK3Cb                                  | RAS          |               |
| A23 | +                    | –     |                                                               |              |               |
| A24 | –                    | –     | EGFR, PDGFR $\alpha$ , PDGFR $\beta$ , VEGFR1, VEGFR2, PIK3Ca | PIK3Ca       |               |
| A25 | –                    | +     | PDK1                                                          | BRAF         |               |
| A26 | +                    | –     | EGFR, VEGFR1, PIK3Ca                                          |              |               |
| A27 | +                    | +     | EGFR, VEGFR1, PIK3Ca                                          |              |               |
| A28 | –                    | +     |                                                               | BRAF         |               |
| F33 | +                    | –     | VEGFR1, PIK3Cb, AKT2                                          |              |               |
| F35 | –                    | +     | VEGFR1                                                        | RAS, PTEN    |               |
| F36 | +                    | +     | VEGFR1, AKT2                                                  |              |               |
| F37 | –                    | –     | EGFR, VEGFR1, PIK3Ca, PIK3Cb, PDK1, AKT1, AKT2                |              |               |
| F38 | –                    | +     |                                                               | PIK3Ca       |               |
| F39 | +                    | –     | EGFR, PDGFR $\beta$ , VEGFR1, PIK3Ca, PIK3Cb, AKT2            |              |               |
| F41 | +                    | –     | EGFR, PDGFR $\beta$ , VEGFR1, PIK3Ca, PIK3Cb, AKT2            |              |               |
| F42 | +                    | –     | PIK3Ca, PIK3Cb                                                |              |               |
| F43 | +                    | –     | PIK3Ca                                                        | RAS          |               |
| F44 | +                    | –     | VEGFR1, PIK3Ca, AKT2                                          |              |               |
| F45 | +                    | –     | VEGFR1, KIT, MET, PIK3Cb                                      |              |               |
| F47 | +                    | –     | PIK3Ca, PIK3Cb                                                |              |               |
| F48 | +                    | –     | PIK3Ca, PIK3Cb                                                |              |               |
| F50 | –                    | +     |                                                               | RAS          |               |
| F51 | +                    | +     | EGFR, KIT, PIK3Cb, AKT2                                       | RAS          |               |
| F52 | –                    | –     | PDGFR $\alpha$                                                |              |               |
| F53 | +                    | +     | KIT, MET, PDK1                                                |              |               |
| F54 | –                    | –     |                                                               |              |               |
| F55 | +                    | –     | EGFR, KIT, MET                                                |              |               |
| F57 | –                    | –     | EGFR, VEGFR1                                                  |              |               |
| F60 | –                    | –     | EGFR, VEGFR1, MET                                             |              |               |
| F61 | +                    | –     | PDGFR $\beta$ , VEGFR1, PIK3Cb                                |              |               |
| F62 | –                    | –     | VEGFR1                                                        |              |               |
| F63 | +                    | –     | PDGFR $\beta$                                                 |              |               |
| F64 | +                    | –     | PDGFR $\alpha$ , VEGFR1, PIK3Ca, PDK1                         |              |               |

+, Positive for immunohistochemical staining of p-Akt or p-ERK; –, negative for immunohistochemical staining of p-Akt or p-ERK.

Akt and p-ERK in 25 selected FTC samples (Fig. 1). As shown in Table 5, 16 of 25 FTC (64%) showed p-Akt immunoreactivity, and six of 25 FTC (24%) showed p-ERK1/2 immunoreactivity. All 16 FTC that showed p-Akt immunoreactivity harbored genetic alterations in the PI3K/Akt pathway. When looking at the specific genetic alterations and their relationship with the acti-

vation of PI3K/Akt pathway as shown in Table 5, eight of nine FTC with *PIK3Ca* copy gain (88.9%), nine of 10 FTC with *PIK3Cb* copy gain (90%), and six of seven FTC with *Akt2* copy gain (85.7%) showed p-Akt immunoreactivity. Among the RTK genes, four of seven FTC with *EGFR* copy gains (57.1%), four of four FTC with *PDGFR $\beta$*  copy gains (100%), eight of 13 with



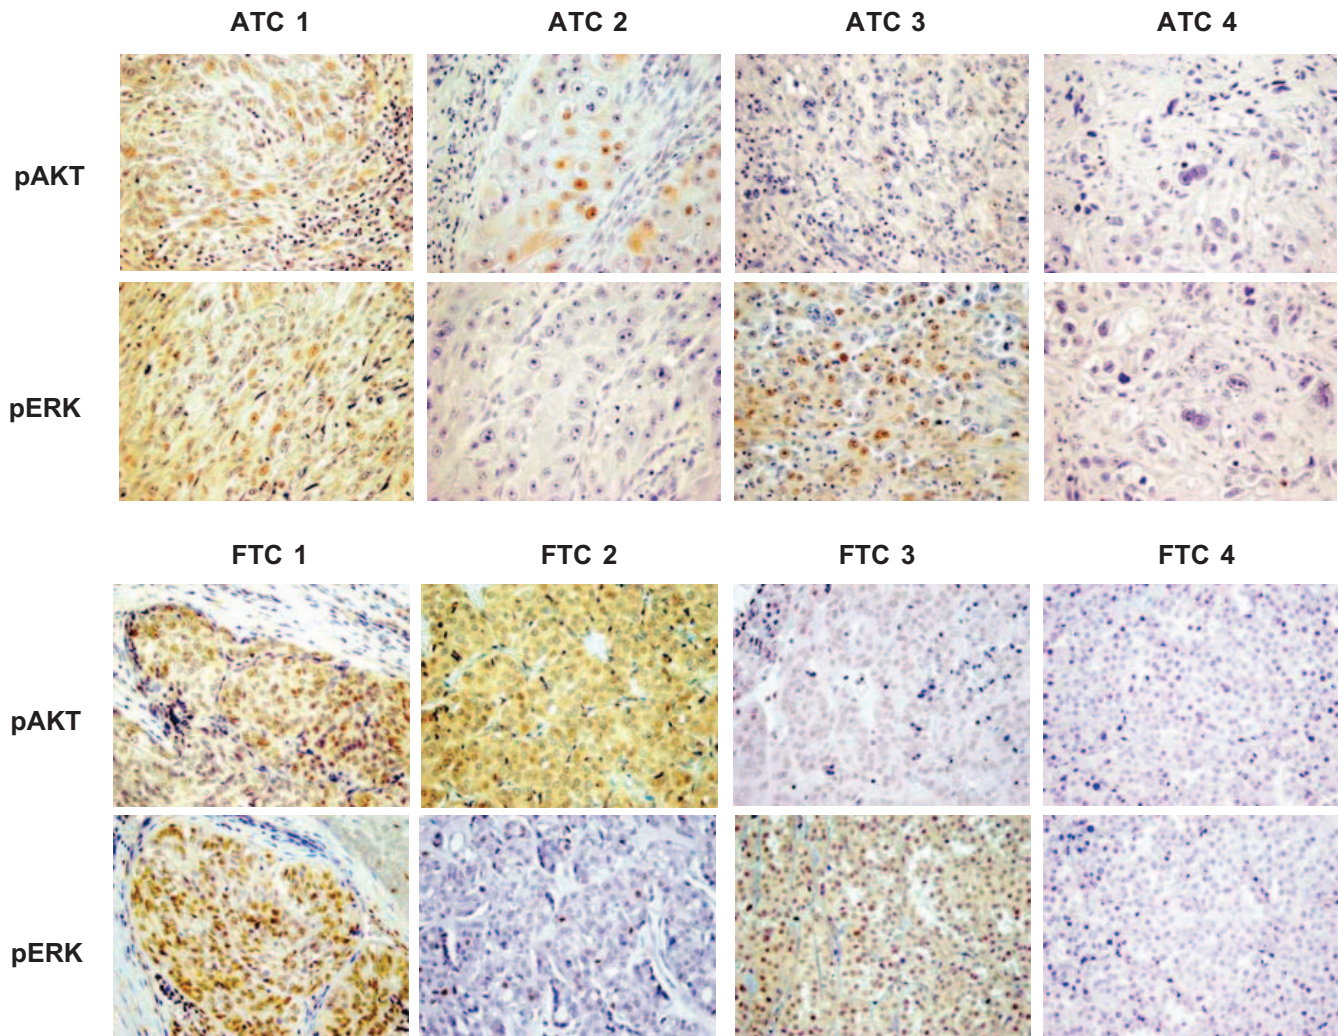

**FIG. 1.** Immunohistochemical analysis of p-Akt and p-ERK in ATC and FTC tissues. Shown are representative samples of ATC and FTC. ATC1 and FTC1 show significant staining with both anti p-Akt and p-ERK antibodies. ATC2 and FTC2 show p-Akt but not p-ERK immunostaining. ATC3 and FTC3 show p-ERK, but not p-Akt immunostaining. ATC4 and FTC4 show no significant staining for either p-Akt or p-ERK.

*VEGFR1* copy gains (61.5%), four of four with *KIT* copy gains (100%), and three of four FTC with *MET* copy gains (75%) showed p-Akt immunoreactivity. Many cases had some normal thyroid tissues adjacent to the tumor tissues on this immunohistochemical analysis, and these areas of normal thyroid tissues did not show p-Akt or p-ERK.

## Discussion

ATC is one of the most pernicious and rapidly progressive human malignancies and accounts for most of the fatalities caused by thyroid cancer. At present, no effective treatment for ATC is available and virtually all patients die rapidly once the diagnosis is established. In recent years, genetic alteration-targeted treatment has emerged to be a highly promising therapeutic approach to human cancers as represented by RTKs, which, with their mutations and copy number gains, are promising therapeutic targets in many cancers (14). One such specific example is the EGFR, whose activating mutations and genetic copy gains have

become the basis for predictable effectiveness of treatments targeted at EGFR in non-small-cell lung cancer (31).

Because activating genetic alterations are commonly seen in the PI3K/Akt and MAPK pathways coupled to RTKs, these two major signaling pathways have also emerged to be important therapeutic targets in the development of novel therapy for human cancers (8, 11, 12). A limited number of genes in these signaling pathways have been recently explored in ATC and shown to frequently harbor genetic alterations, such as *PIK3Ca* copy gain and *BARF* mutation (3, 5). It remains unclear, however, how common the genetic alterations can be in other critical genes in these signaling pathways and hence how extensive these pathways are involved in ATC tumorigenesis. To provide a full-scale genetic basis for the understanding of the role of RTKs and their coupled PI3K/Akt and MAPK pathways in ATC, we extended previous studies to explore genetic alterations in a large and comprehensive panel of genes in these pathways in ATC.

We for the first time demonstrated a high prevalence of copy number gains in several major RTK genes in ATC and FTC, including the *EGFR*, *PDGFR $\alpha$* , *PDGFR $\beta$* , and *VEGFR1* genes

(Table 2). These findings, as in several other aggressive human cancers (31), underscore that copy number gain of RTK genes is an important genetic event and may represent a potentially effective therapeutic target in ATC. It is interesting to note that copy number gains of these RTK genes were more commonly associated with p-Akt than p-ERK in both ATC and FTC, suggesting that genetically activated RTKs preferentially use the PI3K/Akt pathway to promote ATC and FTC tumorigenesis and invasiveness. We also, for the first time, demonstrated a high prevalence of *PIK3Cb* copy gain in both ATC and FTC (Table 2), suggesting that this genetic alteration, like the *PIK3Ca* copy gain commonly seen in FTC and ATC (Table 2) (5), may play an important role in thyroid tumorigenesis through the PI3K/Akt pathway. The *PIK3Cb* copy gain has recently been found in other cancers such as ovarian cancer (32). Unlike *PIK3Ca*, *Ras*, and *PTEN* genes, mutations were uncommon in other genes examined in the PI3K/Akt pathway. Our real-time PCR approach could not definitively indicate genomic amplification *vs.* polysomy as the cause of gene copy number gains. However, regardless of the mechanism for their occurrence, copy gains of these tumor growth-promoting genes most likely play a role in the aberrant activation of PI3K/Akt and MAPK pathways in thyroid tumors as evidenced by their association with p-Akt or p-ERK in most cases.

The classical MAPK pathway-activating *BRAF* mutation was relatively common in ATC (Table 2). A few cases of ATC also harbored *RET/PTC*, but some of them contained PTC tissues, which could be the source of *RET/PTC*. Overall, most of these genetic alterations were correlated with increased p-Akt or p-ERK, consistent with their expected functionality. However, genetic alterations in some specimens were not associated with p-Akt or p-ERK. One explanation for this difference is that not all the genetic alterations found in this study may be functional in ATC, although these genetic alterations have been found to be functionally significant in other cancers. This could be due to a possibly differential role of these genetic alterations in different tissues. Alternatively, the lack of p-Akt or p-ERK might reflect the loss of phosphoproteins in tissue specimens due to inappropriate handling during the initial pathological processing and preserving process.

It is striking that up to 95.8% of ATC harbored at least one of the genetic alterations in RTKs and the PI3K/Akt and MAPK pathways and 81.3% of ATC had genetic alterations that could activate both PI3K/Akt and MAPK pathways. The coexistence of two or more of these genetic alterations was seen in most ATCs, particularly between mutation and copy number gains and among copy number gains (Table 3), underlying a possible genetic mechanism for amplifying and enhancing the aberrant signaling of these pathways. Although the prevalence of the genetic alterations found in the present study is already high, the results are likely still an underestimate as the number of the genes analyzed is still relatively limited and some genetic alterations, such as mutations, were only partially analyzed on these genes (*i.e.* only on certain exons). The overall genetic alterations and their coexistence in RTKs and the PI3K/Akt and MAPK pathways were more commonly seen in ATC than FTC (Tables 2–4). These genetic findings strongly suggest that RTKs and their cou-

pled PI3K/Akt and MAPK pathways may play an extensive and fundamental role in ATC tumorigenesis and aggressiveness. Unlike the mutual exclusivity between mutations and the *PIK3Ca* copy gain in FTC (Table 4) (5, 30), gene mutations commonly coexisted with copy number gains of RTK genes in this cancer (Table 4). Our genetic analysis with a large panel of additional genes in RTKs and PI3K/Akt pathways in the present study revealed a significantly higher overall prevalence of genetic alterations in FTC than we previously reported on a limited number of genes (5, 30). These genetic alterations were mostly associated with p-Akt (Table 5). These data further support the notion that the PI3K/Akt pathway also plays an important role in FTC tumorigenesis.

In summary, by exploring genetic alterations in a large and comprehensive panel of genes in RTKs and their coupled PI3K/Akt and MAPK pathways, we extensively extended previous genetic observation in these pathways in thyroid cancers, including the first demonstration of copy number gains of RTKs genes and *PIK3Cb* in ATC and FTC, particularly the former. In ATC, we demonstrated a strikingly high prevalence of genetic alterations (involving virtually every tumor) and the common presence of genetic alterations that could activate both the PI3K/Akt and MAPK pathways. The data thus provided strong genetic evidence suggesting that genetically altered RTKs and their coupled PI3K/Akt and MAPK pathways may play an extensive role in the tumorigenesis and aggressiveness of ATC. Specific genotype-based targeting at these signaling pathways may be an effective therapeutic strategy for ATC.

## Acknowledgments

We thank Dr. Yuri E Nikiforov for kindly providing us with the cDNA for *RET/PTC3* analysis.

Address all correspondence and requests for reprints to: Michael Mingzhao Xing, M.D., Ph.D., Division of Endocrinology and Metabolism, the Johns Hopkins University School of Medicine, 1830 East Monument Street, Suite 333, Baltimore, Maryland 21287. E-mail: mxing1@jhmi.edu.

This work was partly supported by American Cancer Society Grant RSG-05-199-01-CCE (to M.X.).

Disclosure Statement: The authors have nothing to disclose.

## References

1. Ries LAG, Melbert D, Krapcho M, Mariotto A, Miller BA, Feuer EJ, Clegg L, Horner MJ, Howlander N, Eisner MP, Reichman M, Edwards BK, eds. 2007 SEER Cancer Statistics Review, 1975–2004, National Cancer Institute. Bethesda, MD. [http://seer.cancer.gov/csr/1975\\_2004/](http://seer.cancer.gov/csr/1975_2004/), based on November 2006 SEER data submission, posted to the SEER Web site, 2007
2. Cornett WR, Sharma AK, Day TA, Richardson MS, Hoda RS, van Heerden JA, Fernandes JK 2007 Anaplastic thyroid carcinoma: an overview. *Curr Oncol Rep* 9:152–158
3. García-Rostán G, Costa AM, Pereira-Castro I, Salvatore G, Hernandez R, Hermsem MJ, Herrero A, Fusco A, Cameselle-Teijeiro J, Santoro M 2005 Mutation of the *PIK3CA* gene in anaplastic thyroid cancer. *Cancer Res* 65: 10199–10207
4. Abubaker J, Jehan Z, Bavi P, Sultana M, Al-Harbi S, Ibrahim M, Al-Nuaim A, Ahmed M, Amin T, Al-Fehaily M, Al-Sanea O, Al-Dayel F, Uddin S, Al-Kuraya KS 2008 Clinicopathological analysis of papillary thyroid cancer with *PIK3CA*

- alterations in a Middle Eastern population. *J Clin Endocrinol Metab* 93:611–618
5. Hou P, Liu D, Shan Y, Hu S, Studeman K, Condouris S, Wang Y, Trink A, El-Naggar AK, Tallini G, Vasko V, Xing M 2007 Genetic alterations and their relationship in the phosphatidylinositol 3-kinase/Akt pathway in thyroid cancer. *Clin Cancer Res* 13:1161–1170
  6. Xing M 2007 *BRAF* mutation in papillary thyroid cancer: pathogenic role, molecular bases, and clinical implications. *Endocr Rev* 28:742–762
  7. Santarpia L, El-Naggar AK, Cote GJ, Myers JN, Sherman SI 2008 Phosphatidylinositol 3-kinase/akt and ras/raf-mitogen-activated protein kinase pathway mutations in anaplastic thyroid cancer. *J Clin Endocrinol Metab* 93:278–284
  8. Fresno Vara JA, Casado E, de Castro J, Cejas P, Belda-Iniesta C, Gonzalez-Baron M 2004 PI3K/Akt signalling pathway and cancer. *Cancer Treat Rev* 30:193–204
  9. Samuels Y, Ericson K 2006 Oncogenic PI3K and its role in cancer. *Curr Opin Oncol* 18:77–82
  10. Sansal I, Sellers WR 2004 The biology and clinical relevance of the PTEN tumor suppressor pathway. *J Clin Oncol* 22:2954–2963
  11. Sebolt-Leopold JS, Herrera R 2004 Targeting the mitogen-activated protein kinase cascade to treat cancer. *Nat Rev Cancer* 4:937–947
  12. Rodriguez-Viciana P, Tetsu O, Oda K, Okada J, Rauen K, McCormick F 2005 Cancer targets in the Ras pathway. *Cold Spring Harb Symp Quant Biol* 70:461–467
  13. Vasko V, Ferrand M, Di Cristofaro J, Carayon P, Henry JF, de Micco C 2003 Specific pattern of RAS oncogene mutations in follicular thyroid tumors. *J Clin Endocrinol Metab* 88:2745–2752
  14. Gschwind A, Fischer OM, Ullrich A 2004 The discovery of receptor tyrosine kinases: targets for cancer therapy. *Nat Rev Cancer* 4:361–370
  15. Hirsch FR, Varella-Garcia M, Bunn Jr PA, Di Maria MV, Veve R, Bremmes RM, Barón AE, Zeng C, Franklin WA 2003 Epidermal growth factor receptor in non-small-cell lung carcinomas: correlation between gene copy number and protein expression and impact on prognosis. *J Clin Oncol* 21:3798–3807
  16. Cappuzzo F, Hirsch FR, Rossi E, Bartolini S, Ceresoli GL, Bemis L, Haney J, Witt S, Danenberg K, Domenichini I, Ludovini V, Magrini E, Gregorc V, Doglioni C, Sidoni A, Tonato M, Franklin WA, Crino L, Bunn Jr PA, Varella-Garcia M 2005 Epidermal growth factor receptor gene and protein and gefitinib sensitivity in non-small-cell lung cancer. *J Natl Cancer Inst* 97:643–655
  17. Puputti M, Tynninen O, Sihto H, Blom T, Mäenpää H, Isola J, Paetau A, Joensuu H, Nupponen NN 2006 Amplification of KIT, PDGFRA, VEGFR2, and EGFR in gliomas. *Mol Cancer Res* 4:927–934
  18. Lassus H, Sihto H, Leminen A, Nordling S, Joensuu H, Nupponen NN, Butzow R 2004 Genetic alterations and protein expression of KIT and PDGFRA in serous ovarian carcinoma. *Br J Cancer* 91:2048–2055
  19. Hirota S, Ohashi A, Nishida T, Isozaki K, Kinoshita K, Shinomura Y, Kitamura Y 2003 Gain-of-function mutations of platelet-derived growth factor receptor  $\alpha$  gene in gastrointestinal stromal tumors. *Gastroenterology* 125:660–667
  20. Joensuu H, Puputti M, Sihto H, Tynninen O, Nupponen NN 2005 Amplification of genes encoding KIT, PDGFRA and VEGFR2 receptor tyrosine kinases is frequent in glioblastoma multiforme. *J Pathol* 207:224–231
  21. Walter JW, North PE, Waner M, Mizeracki A, Blei F, Walker JW, Reinisch JF, Marchuk DA 2002 Somatic mutation of vascular endothelial growth factor receptors in juvenile hemangioma. *Genes Chromosomes Cancer* 33:295–303
  22. Antonescu CR, Busam KJ, Francone TD, Wong GC, Guo T, Agaram NP, Besmer P, Jungbluth A, Gimbel M, Chen CT, Veach D, Clarkson BD, Paty PB, Weiser MR 2007 L576P KIT mutation in anal melanomas correlates with KIT protein expression and is sensitive to specific kinase inhibition. *Int J Cancer* 121:257–264
  23. Christensen JG, Burrows J, Salgia R 2005 MET as a target for human cancer and characterization of inhibitors for therapeutic intervention. *Cancer Lett* 225:1–26
  24. Sattler M, Salgia R 2007 c-Met and hepatocyte growth factor: potential as novel targets in cancer therapy. *Curr Oncol Rep* 9:102–108
  25. Normanno N, De Luca A, Bianco C, Strizzi L, Mancino M, Maiello MR, Carotenuto A, De Feo G, Caponigro F, Salomon DS 2006 Epidermal growth factor receptor (EGFR) signaling in cancer. *Gene* 366:2–16
  26. Parsons DW, Wang TL, Samuels Y, Bardelli A, Cummins JM, DeLong L, Silliman N, Ptak J, Szabo S, Willson JK, Markowitz S, Kinzler KW, Vogelstein B, Lengauer C, Velculescu VE 2005 Colorectal cancer: mutations in a signaling pathway. *Nature* 436:792
  27. Carpten JD, Faber AL, Horn C, Donoho GP, Briggs SL, Robbins CM, Hostetter G, Boguslawski S, Moses TY, Savage S, Uhlik M, Lin A, Du J, Qian YW, Zeckner DJ, Tucker-Kellogg G, Touchman J, Patel K, Mousset S, Bittner M, Schevitz R, Lai MH, Blanchard KL, Thomas JE 2007 A transforming mutation in the pleckstrin homology domain of AKT1 in cancer. *Nature* 448:439–444
  28. Wu G, Mambo E, Guo Z, Hu S, Huang X, Gollin SM, Trink B, Ladenson PW, Sidransky D, Xing M 2005 Uncommon mutation, but common amplifications, of the PIK3CA gene in thyroid tumors. *J Clin Endocrinol Metab* 90:4688–4693
  29. Nikiforova MN, Caudill CM, Biddinger P, Nikiforov YE 2002 Prevalence of RET/PTC rearrangements in Hashimoto's thyroiditis and papillary thyroid carcinomas. *Int J Surg Pathol* 10:15–22
  30. Wang Y, Hou P, Yu H, Wang W, Ji M, Zhao S, Yan S, Sun X, Liu D, Shi B, Zhu G, Condouris S, Xing M 2007 High prevalence and mutual exclusivity of genetic alterations in the phosphatidylinositol-3-kinase/akt pathway in thyroid tumors. *J Clin Endocrinol Metab* 92:2387–2390
  31. Bareschino MA, Schettino C, Troiani T, Martinelli E, Morgillo F, Ciardiello F 2007 Erlotinib in cancer treatment. *Ann Oncol* 18(Suppl 6):vi35–vi41
  32. Zhang L, Huang J, Yang N, Greshock J, Liang S, Hasegawa K, Giannakakis A, Poulos N, O'Brien-Jenkins A, Katsaros D, Butzow R, Weber BL, Coukos G 2007 Integrative genomic analysis of phosphatidylinositol 3'-kinase family identifies PIK3R3 as a potential therapeutic target in epithelial ovarian cancer. *Clin Cancer Res* 13:5314–5321
